# Supplementary material
Source: Springer Nature journal article supplement (https://www.springermedizin.de/resource/supplementary/12913_2011_1831_MOESM1_ESM.pdf/9529038)
Supplement: MOESM1 [file 9529038]

- Denmark has a tax-financed health care system with free access to medical advice and treatment in general practices and hospitals.
- All GPs in Denmark are independent contractors with the public health service and are remunerated on a mixed fee for service and capitation basis.
- Almost all (98%) citizens are listed with a particular general practice which they have to consult for advice and treatment. The practice list size is on average 1,550 patients per GP (including children).
- GPs act as gatekeepers to investigations and hospital referrals.
